# Supplementary material
Source: Springer Nature journal article supplement (https://www.springermedizin.de/resource/supplementary/12947_2012_431_MOESM3_ESM.pdf/9555740)

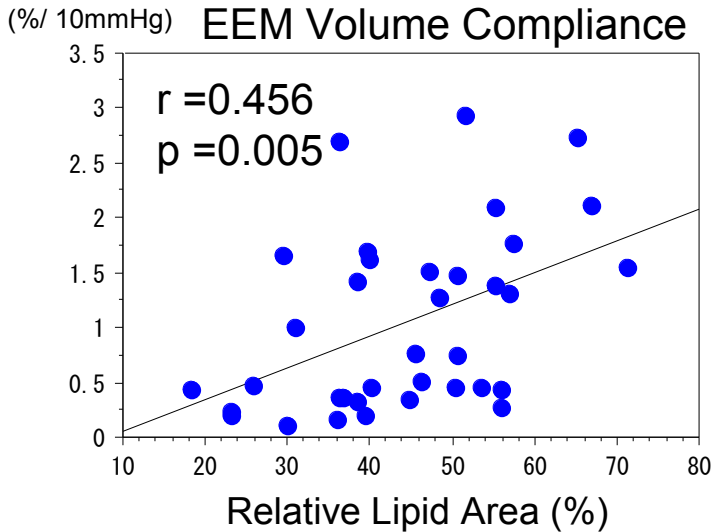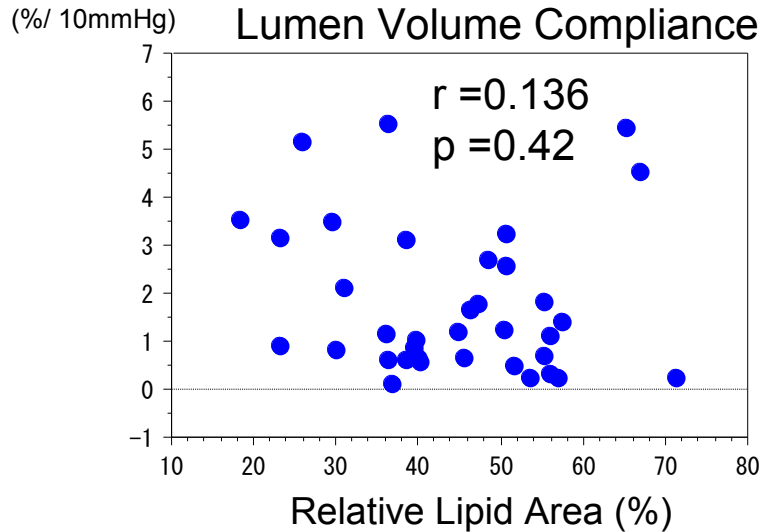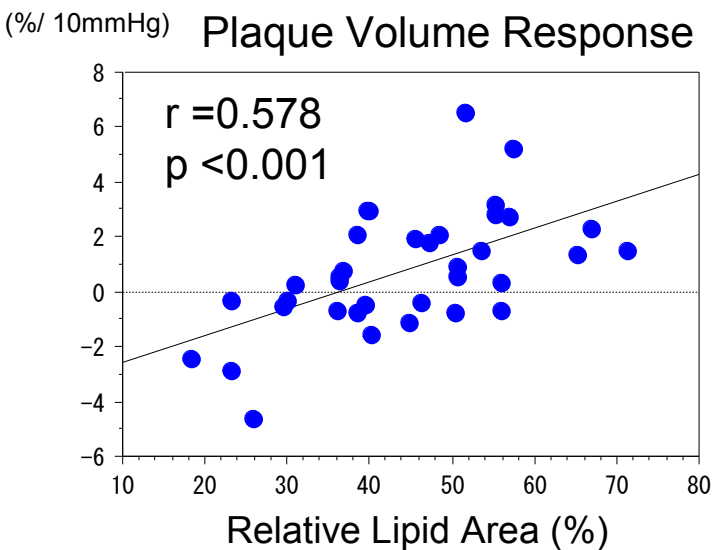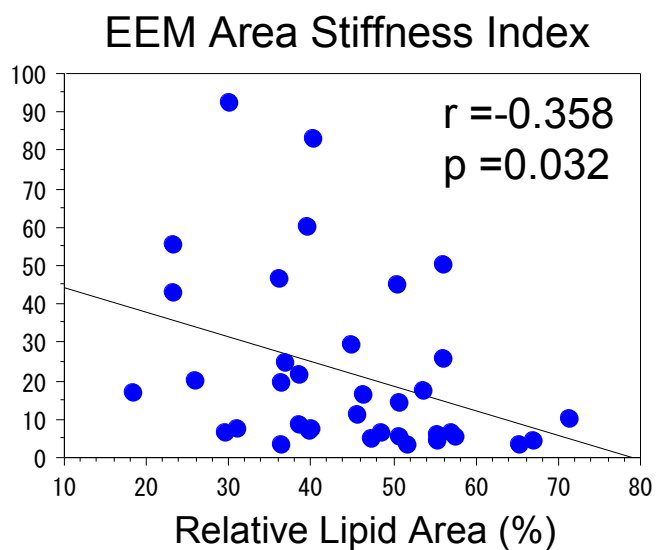

Supplement: MOESM3 [file 9555740]
